# Supplementary figures and images for: Molecular Characterization of the Acyl-CoA-Binding Protein Genes Reveals Their Significant Roles in Oil Accumulation and Abiotic Stress Response in Cotton
Source: MDPI journal article supplement (doi:10.3390/genes14040859), 2023-04-01

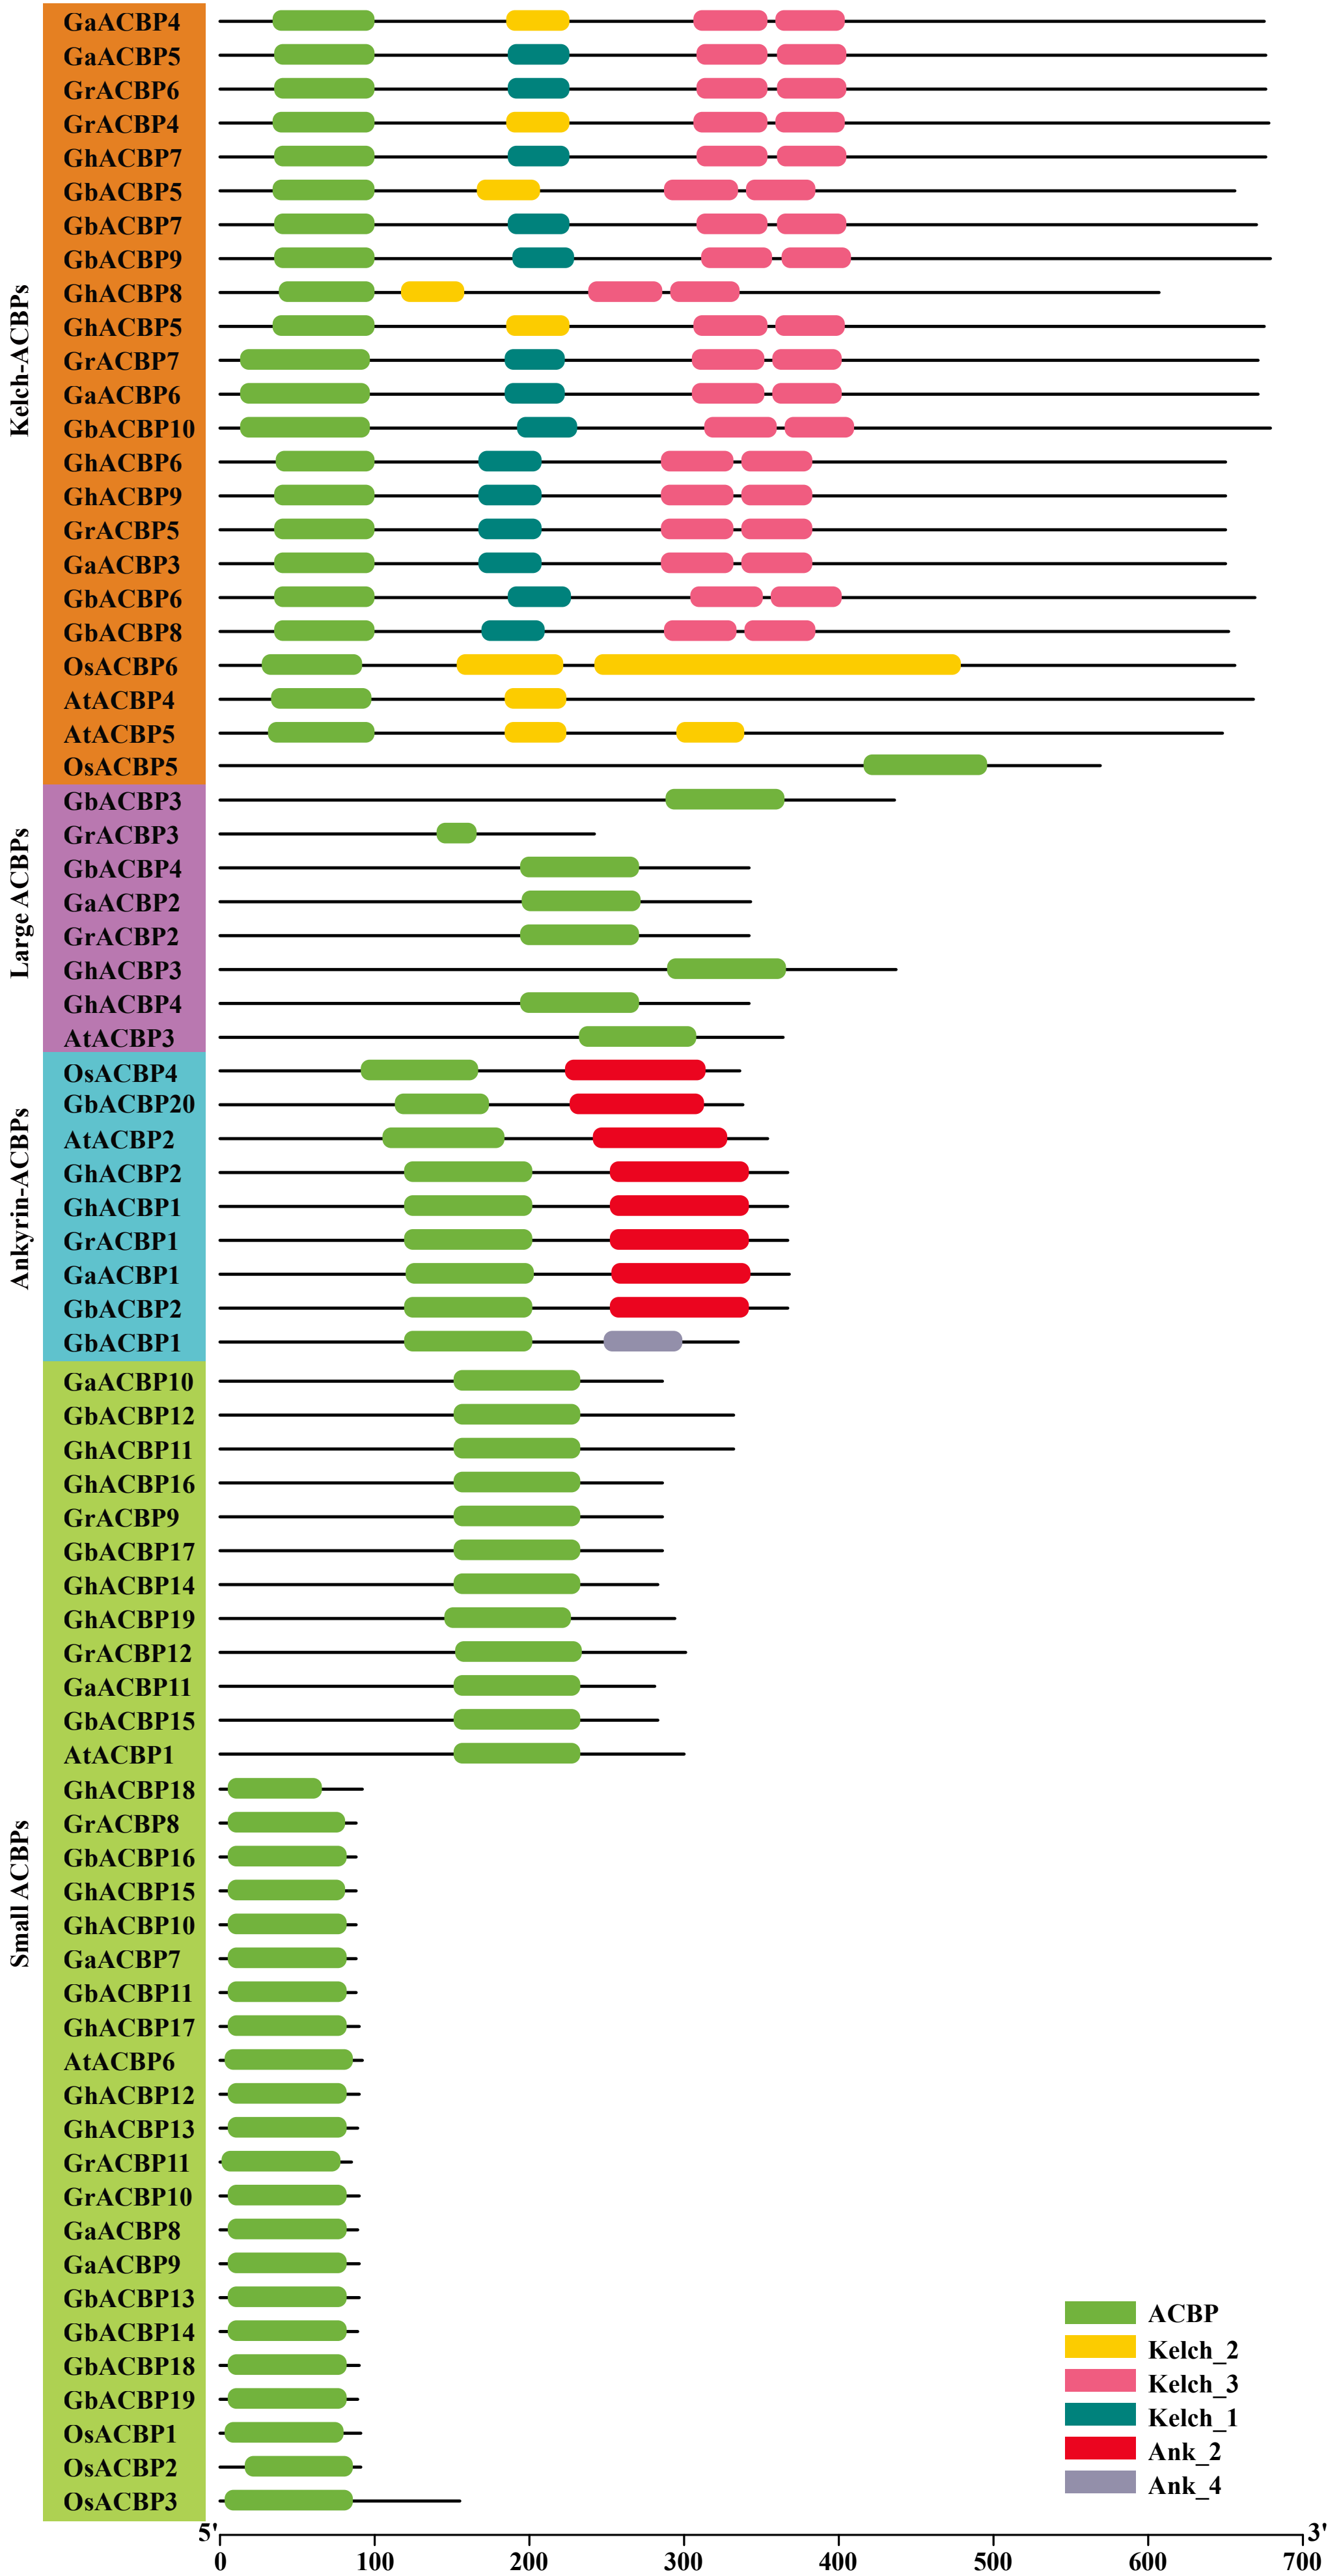

Supplement: s1 [file s1]

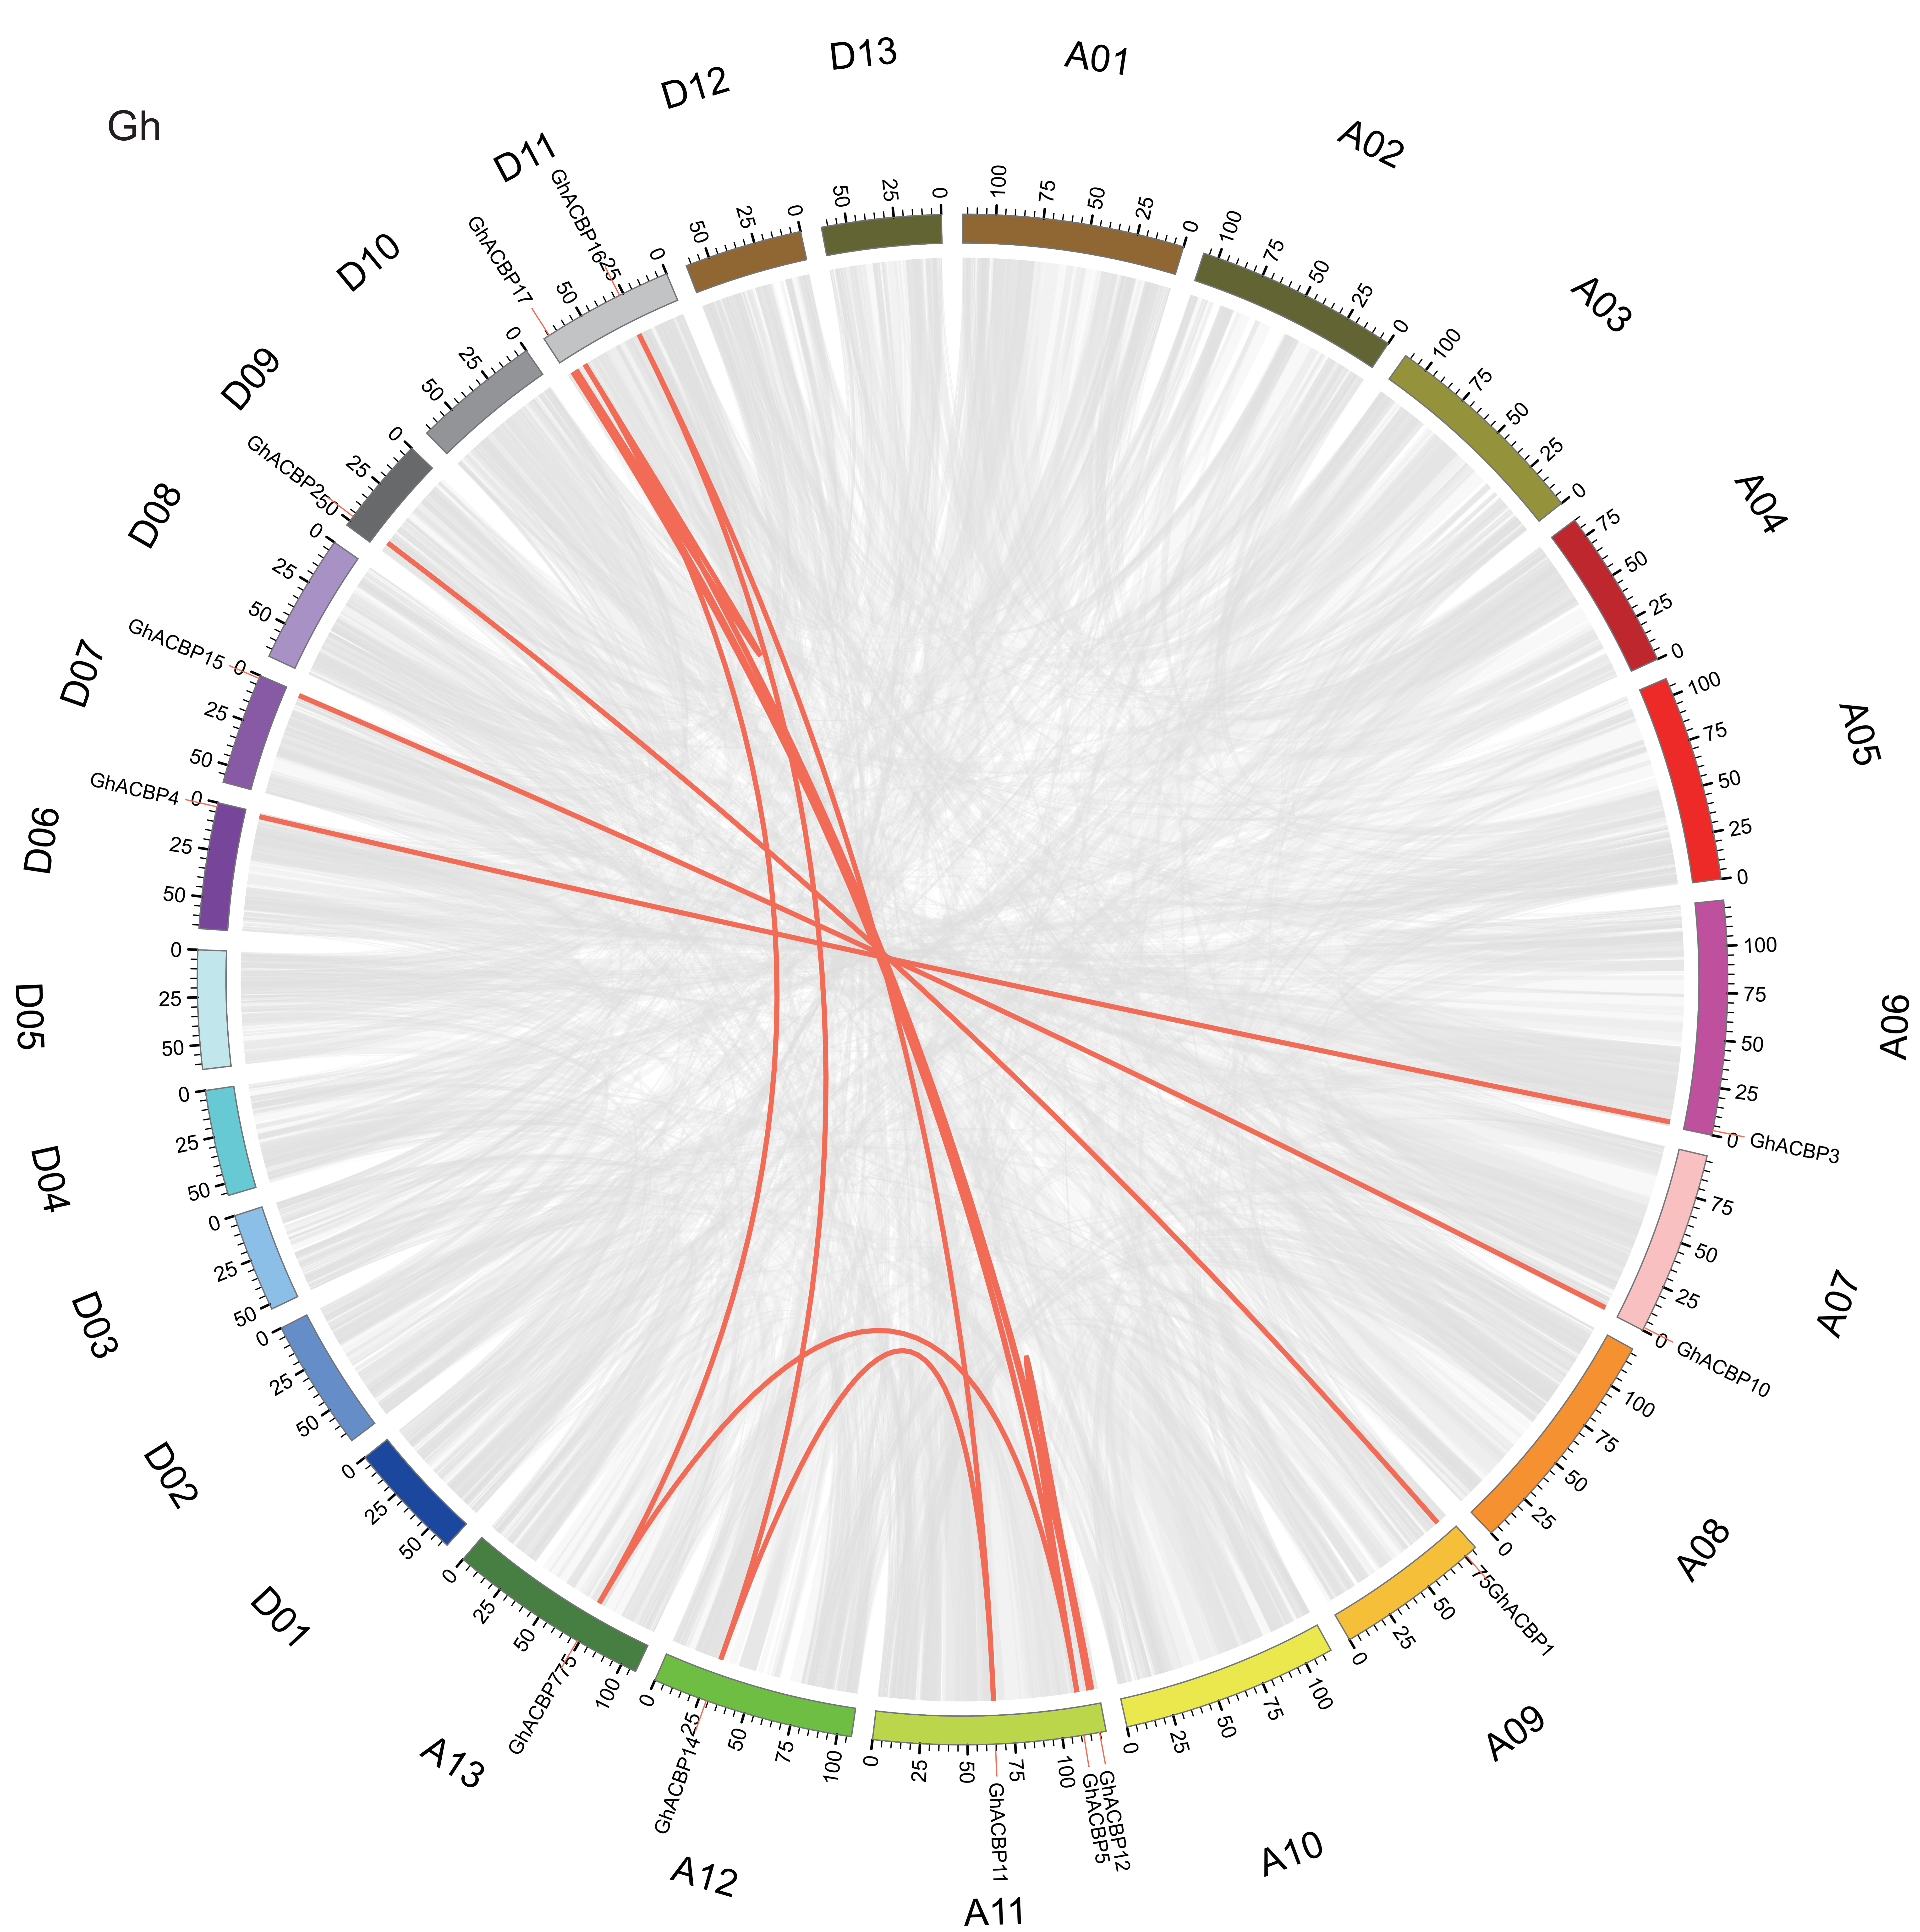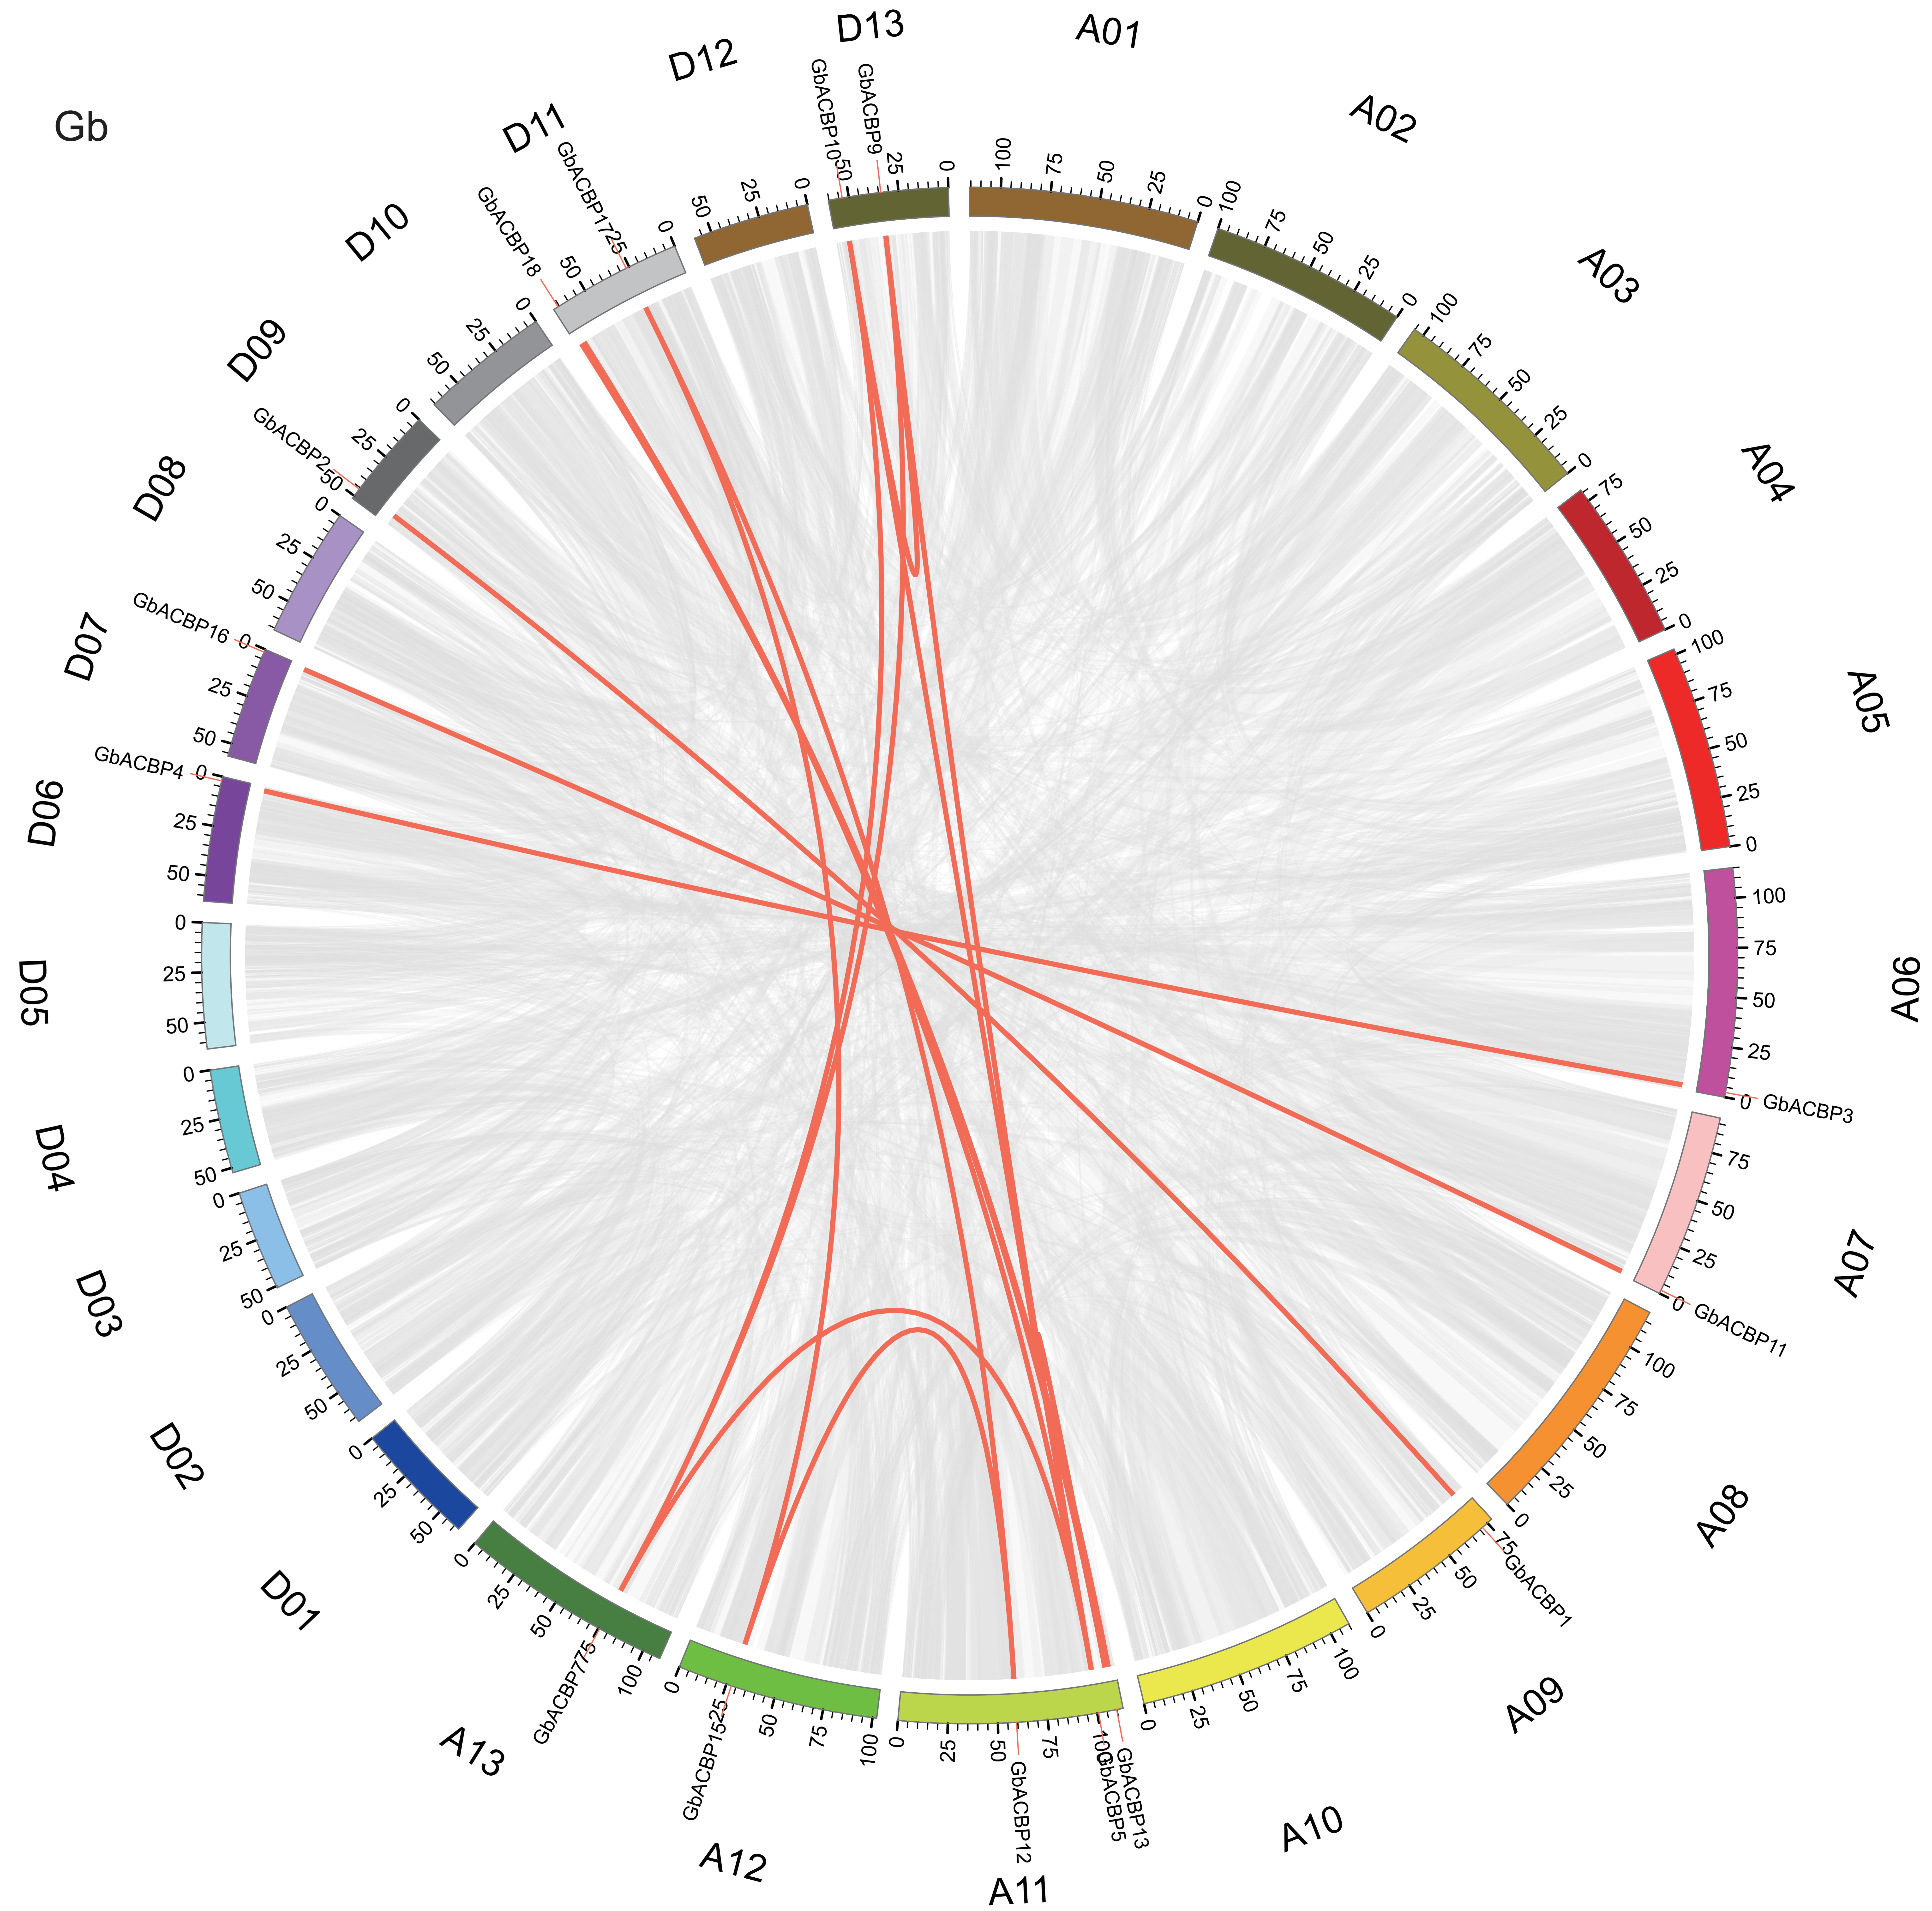

Supplement: s1 [file s1]

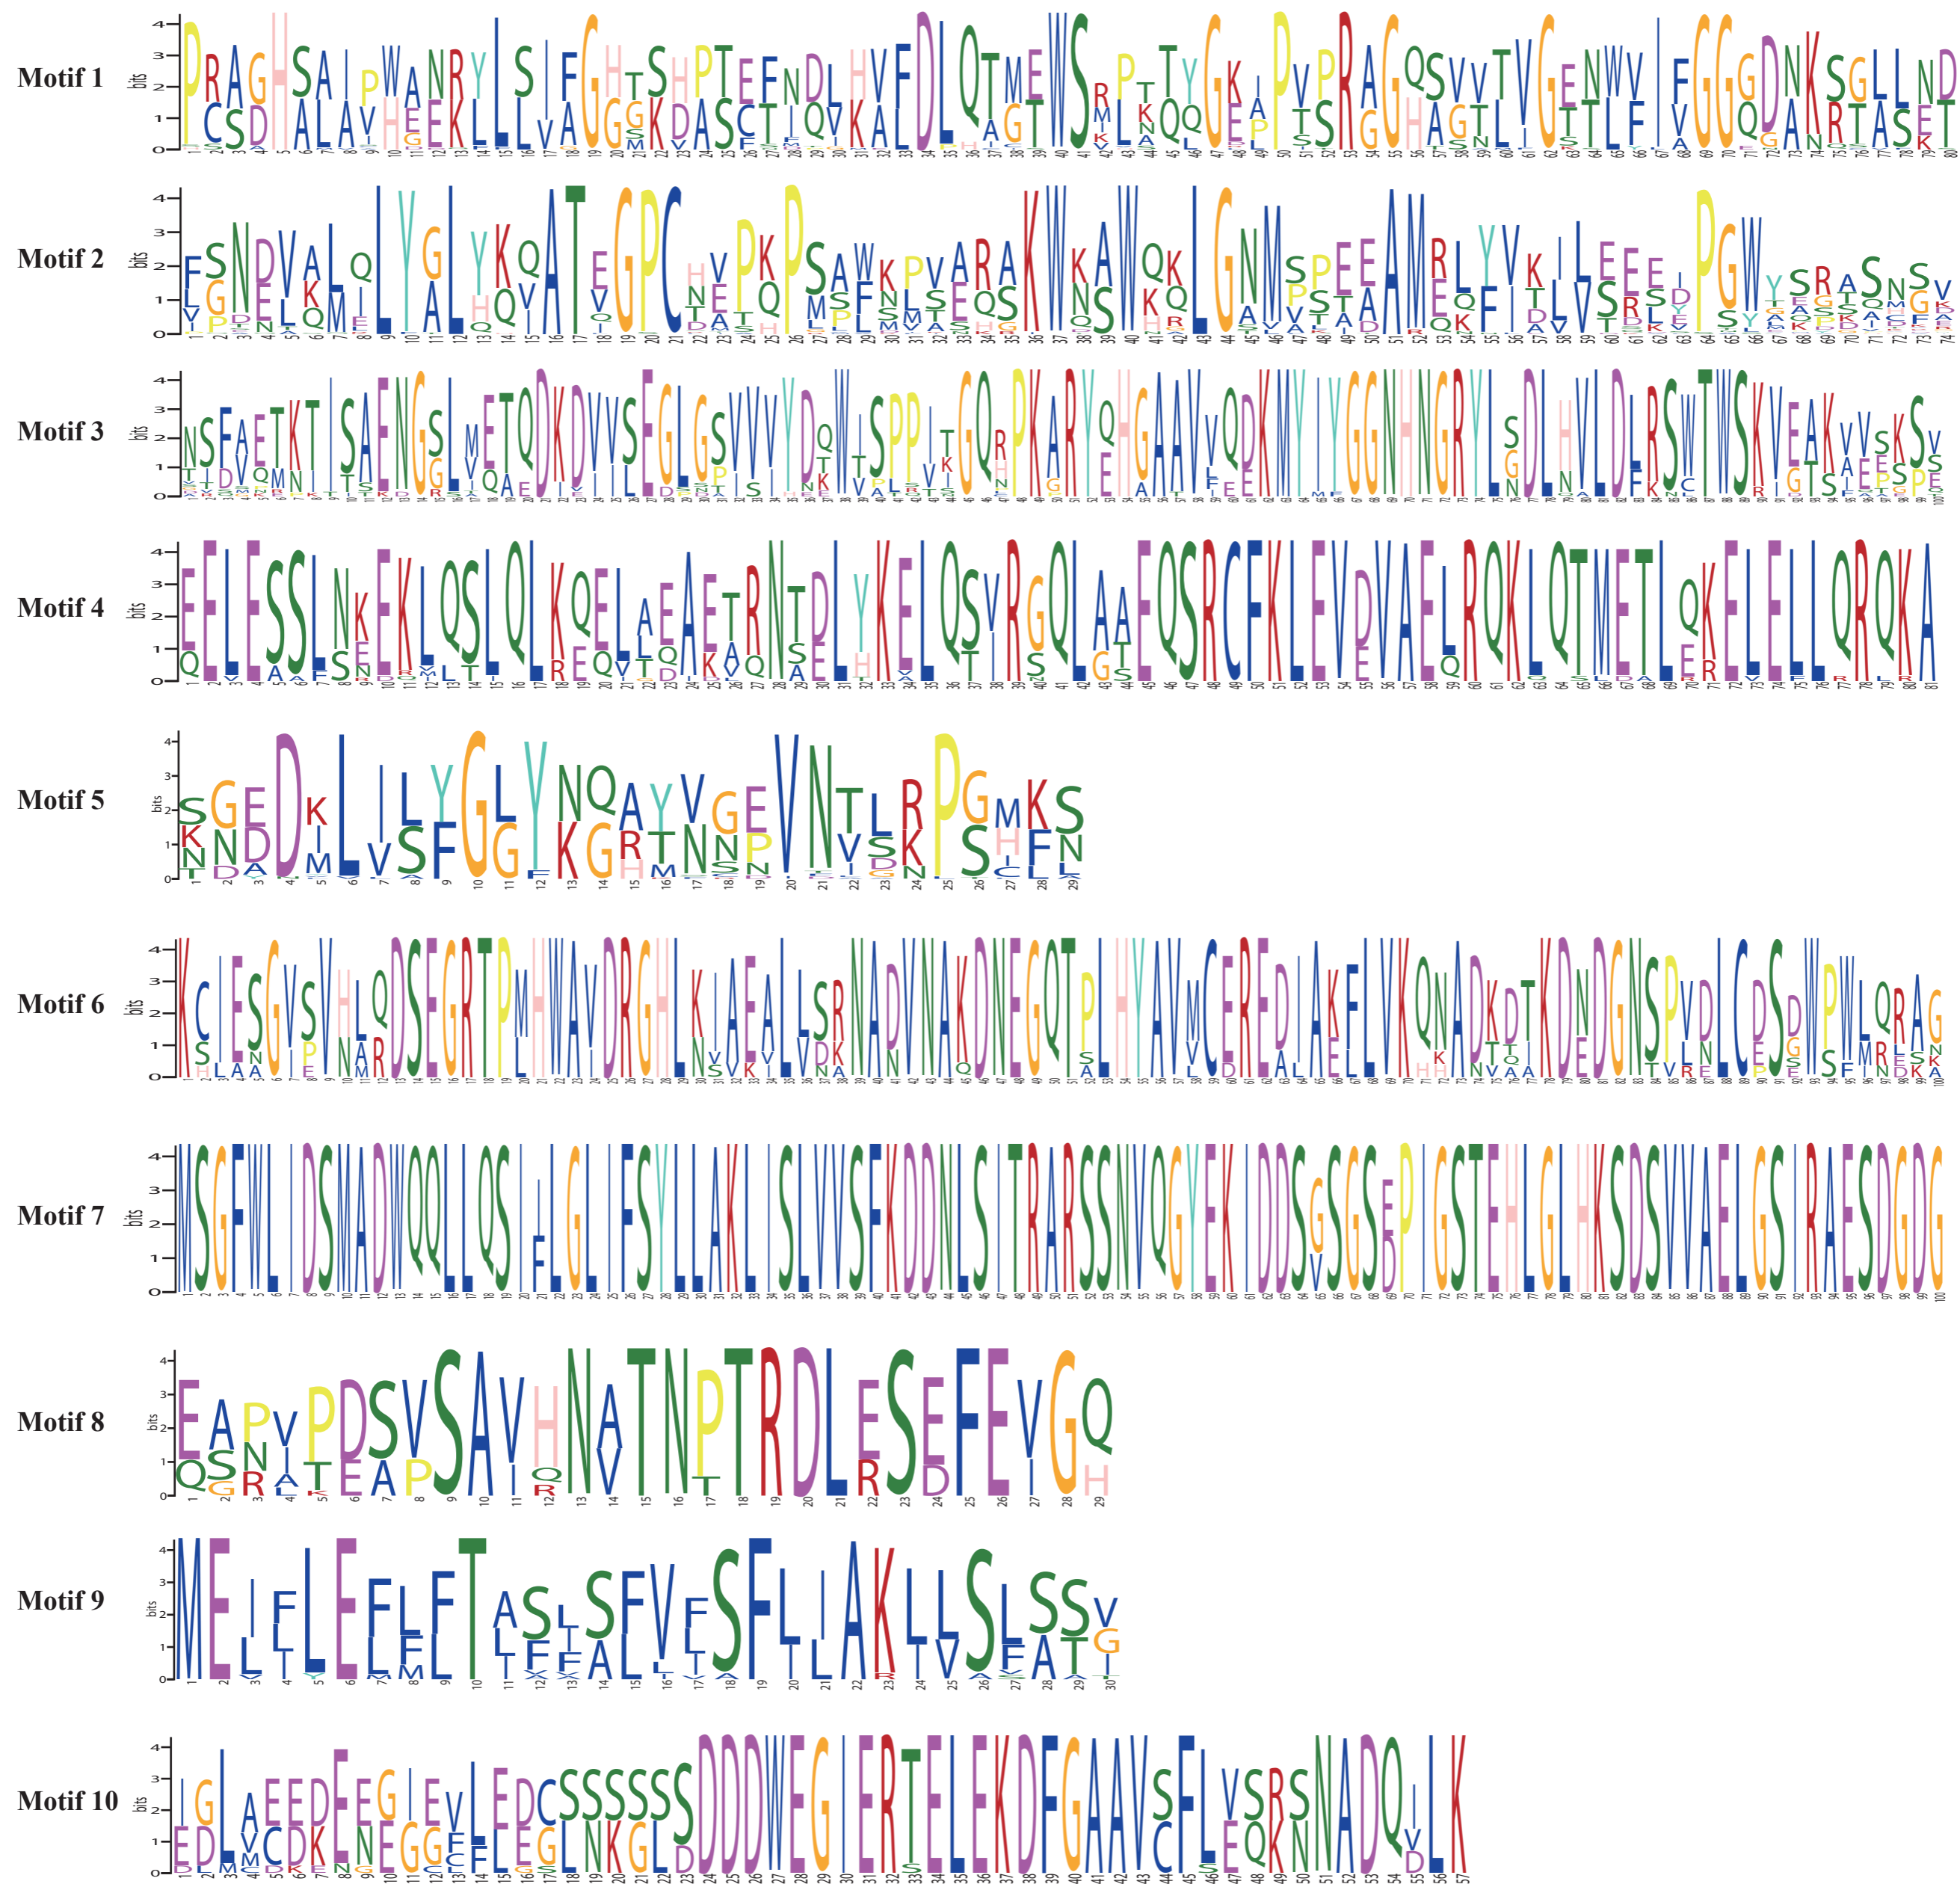

Supplement: s1 [file s1]
